# Supplementary material for: Iron nanotube-silica composite (ZVI-S-PCAT modified silica composite) preparation, characterization and application as a recyclable catalytic system for 5-membered ring organic transformations
Source: Royal Society of Chemistry journal article supplement (doi:10.1039/c5dt02028j), 2015-01-01

# Size Distribution Report by Intensity

v2.1

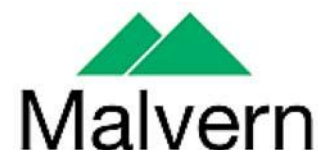

## Sample Details

Sample Name: gurpreet gfe sol 2

SOP Name: mansettings.nano

General Notes: abcd

File Name: hk.dts

Dispersant Name: Water

Record Number: 89

Dispersant RI: 1.330

Material RI: 1.59

Viscosity (cP): 0.8872

Material Absorbance: 0.01

Measurement Date and Time: Thursday, April 24, 2014 1:39...

## System

Temperature (°C): 25.0

Duration Used (s): 60

Count Rate (kcps): 326.8

Measurement Position (mm): 4.65

Cell Description: Disposable sizing cuvette

Attenuator: 11

## Results

|                               | Size (r.nm):         | % Intensity | Width (r.nm): |
|-------------------------------|----------------------|-------------|---------------|
| <b>Z-Average (r.nm): 2065</b> | <b>Peak 1:</b> 52.85 | 100.0       | 6.743e-7      |
| <b>Pdl: 1.000</b>             | <b>Peak 2:</b> 0.000 | 0.0         | 0.000         |
| <b>Intercept: 1.20</b>        | <b>Peak 3:</b> 0.000 | 0.0         | 0.000         |

Result quality : **Refer to quality report**

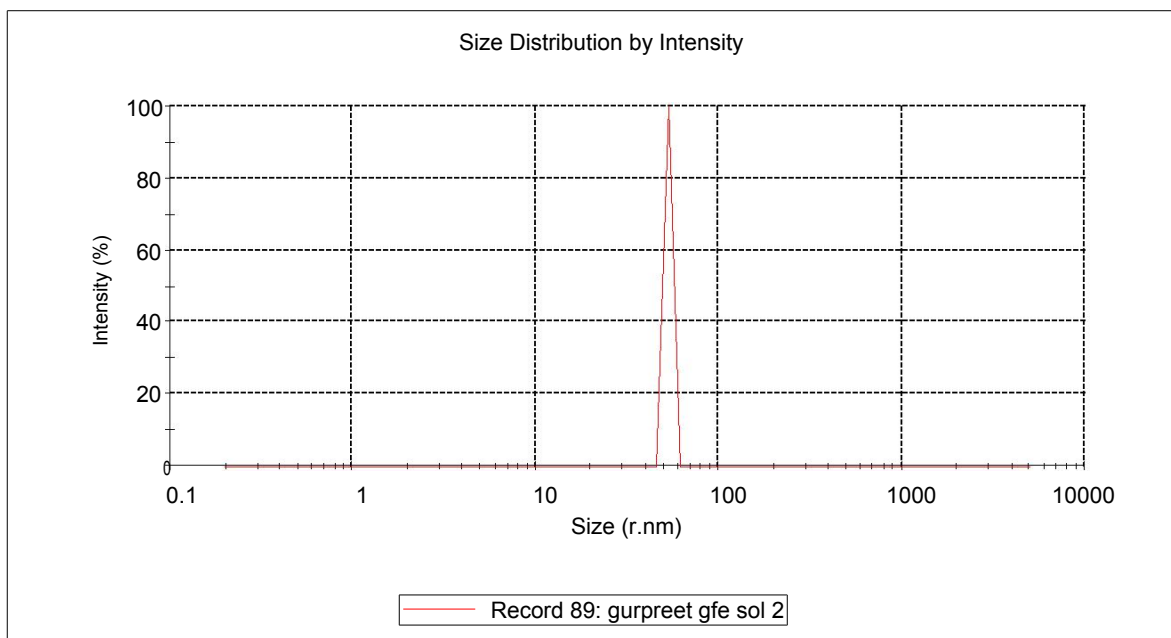

Supplement: c5dt02028j1.pdf [file c5dt02028j1.pdf]
