# Supplementary material for: Iron nanotube-silica composite (ZVI-S-PCAT modified silica composite) preparation, characterization and application as a recyclable catalytic system for 5-membered ring organic transformations
Source: Royal Society of Chemistry journal article supplement (doi:10.1039/c5dt02028j), 2015-01-01

# Size Distribution Report by Intensity

v2.1

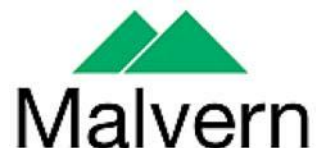

## Sample Details

**Sample Name:** gurpreet gfe sol 1

**SOP Name:** mansettings.nano

**General Notes:** abcd

**File Name:** hk.dts

**Dispersant Name:** Water

**Record Number:** 88

**Dispersant RI:** 1.330

**Material RI:** 1.59

**Viscosity (cP):** 0.8872

**Material Absorbtion:** 0.01

**Measurement Date and Time:** Thursday, April 24, 2014 1:37...

## System

**Temperature (°C):** 24.9

**Duration Used (s):** 60

**Count Rate (kcps):** 351.9

**Measurement Position (mm):** 4.65

**Cell Description:** Disposable sizing cuvette

**Attenuator:** 11

## Results

|                               | Size (r.nm):         | % Intensity | Width (r.nm): |
|-------------------------------|----------------------|-------------|---------------|
| <b>Z-Average (r.nm):</b> 1402 | <b>Peak 1:</b> 65.53 | 100.0       | 4.811         |
| <b>PdI:</b> 1.000             | <b>Peak 2:</b> 0.000 | 0.0         | 0.000         |
| <b>Intercept:</b> 1.18        | <b>Peak 3:</b> 0.000 | 0.0         | 0.000         |

**Result quality :** Refer to quality report

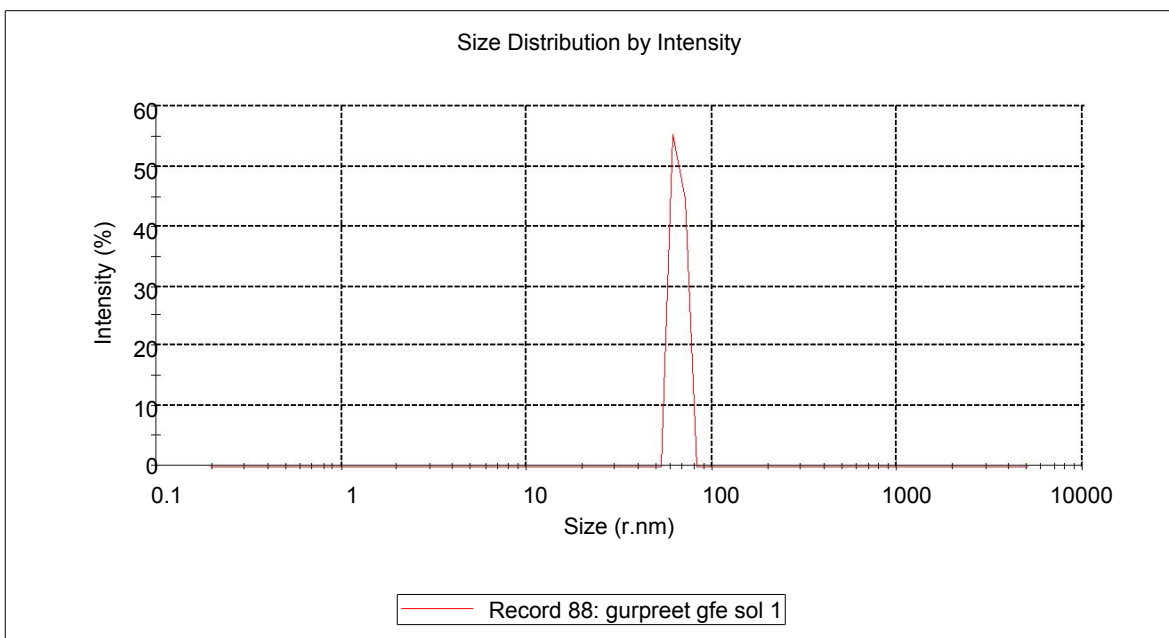

Supplement: c5dt02028j2.pdf [file c5dt02028j2.pdf]
